# Supplementary material
Source: PubMed Central journal article supplement (PMC4630801)
Supplement: NIHMS727463-supplement-Supp_Table_1.pdf [file NIHMS727463-supplement-Supp_Table_1.pdf]

## Supplementary Data

SUPPLEMENTARY APPENDIX TABLE A1. MODEL INPUTS FOR ESTIMATING ILLNESSES, HOSPITALIZATIONS, AND DEATHS FOR *CAMPYLOBACTER*, *ESCHERICHIA COLI* O157, *LISTERIA MONOCYTOGENES*, AND NONTYPHOIDAL *SALMONELLA* AMONG ADULTS AGED  $\geq 65$  YEARS

| <i>Model input</i>                                                                     | <i>Data source(s)</i>                                                                                                                                                                                                                                                                                                         | <i>Probability distribution</i> | <i>Distribution parameters<sup>a</sup></i> |
|----------------------------------------------------------------------------------------|-------------------------------------------------------------------------------------------------------------------------------------------------------------------------------------------------------------------------------------------------------------------------------------------------------------------------------|---------------------------------|--------------------------------------------|
| Laboratory-confirmed illnesses among adults aged $\geq 65$ years (by pathogen)         | Illnesses among adults aged $\geq 65$ years (by pathogen) reported to FoodNet                                                                                                                                                                                                                                                 | Empirical                       | Rate by site and year (2005–2008)          |
| Population adjustment (2005–2008)                                                      | Incidence of infection among adults aged $\geq 65$ years (by pathogen) in each FoodNet site by year applied to 2006 U.S. census population estimates for adults aged $\geq 65$ years (U.S. Census Bureau, 2010)                                                                                                               | Degenerate                      | 1.01, 1.00, 0.99, 0.98                     |
| Severe illness (% of laboratory-confirmed illnesses among adults aged $\geq 65$ years) |                                                                                                                                                                                                                                                                                                                               |                                 |                                            |
| <i>Campylobacter</i>                                                                   | Proportion of case-patients by site reporting bloody diarrhea (FoodNet case-control study of sporadic laboratory-confirmed <i>Campylobacter</i> infections) (Friedman <i>et al.</i> , 2004). UMVU estimators were used for lower and upper endpoints.                                                                         | PERT                            | 36, 45, 52                                 |
| <i>E. coli</i> O157                                                                    | Proportion of adults aged $\geq 65$ years by site reporting bloody diarrhea from two FoodNet case-control studies of sporadic laboratory-confirmed <i>E. coli</i> O157 infections (Kassenborg <i>et al.</i> , 2004; Voetsch <i>et al.</i> , 2007). UMVU estimators were used for lower and upper endpoints.                   | PERT                            | 80, 93, 100                                |
| <i>L. monocytogenes</i>                                                                | Most cases of infection assumed to be severe. Only invasive infections included here.                                                                                                                                                                                                                                         | PERT                            | 95, 100, 100                               |
| <i>Salmonella<sup>b</sup></i>                                                          | Proportion of people reporting bloody diarrhea in FoodNet case-control studies of sporadic laboratory-confirmed <i>Salmonella</i> infections (Hennessy <i>et al.</i> , 2004; Kimura <i>et al.</i> , 2004; Marcus <i>et al.</i> , 2007; Mermin <i>et al.</i> , 2004). UMVU estimators were used for lower and upper endpoints. | PERT                            | 35, 45, 71                                 |
| Medical care sought (% of adults aged $\geq 65$ years)                                 |                                                                                                                                                                                                                                                                                                                               |                                 |                                            |
| <i>L. monocytogenes</i>                                                                | Assumed to have a high rate of medical care-seeking.                                                                                                                                                                                                                                                                          | PERT                            | 80, 90, 100                                |
| Bloody diarrhea <sup>c</sup>                                                           | Proportion (and 95% CI) of survey respondents aged $\geq 50$ years <sup>b</sup> with bloody diarrhea who sought medical care (FoodNet population surveys 2000–2001, 2002–2003, 2006–2007) (CDC, unpublished data).                                                                                                            | PERT                            | 34, 56, 77                                 |
| Nonbloody diarrhea                                                                     | Proportion (and 95% CI) of survey respondents aged $\geq 65$ years with nonbloody diarrhea who sought medical care (FoodNet population surveys 2000–2001, 2002–2003, 2006–2007) (CDC, unpublished data).                                                                                                                      | PERT                            | 16, 22, 28                                 |
| Specimen submitted (% of those who sought medical care)                                |                                                                                                                                                                                                                                                                                                                               |                                 |                                            |
| <i>Listeria monocytogenes</i>                                                          | Assumed to have a high rate of specimen submission.                                                                                                                                                                                                                                                                           | PERT                            | 70, 80, 90                                 |
| Bloody diarrhea <sup>b</sup>                                                           | Proportion (and 95% CI) of survey respondents aged $\geq 50$ years <sup>b</sup> who submitted a stool specimen among people with bloody diarrhea who sought medical care (FoodNet population surveys 2000–2001, 2002–2003, 2006–2007) (CDC, unpublished data).                                                                | PERT                            | 6, 39, 72                                  |
| Nonbloody diarrhea                                                                     | Proportion (and 95% CI) of survey respondents aged $\geq 65$ years who submitted a stool specimen among people with nonbloody diarrhea who sought medical care (FoodNet population surveys 2000–2001, 2002–2003, 2006–2007) (CDC, unpublished data).                                                                          | PERT                            | 3, 21, 39                                  |

(continued)

SUPPLEMENTARY APPENDIX TABLE A1. (CONTINUED)

| <i>Model input</i>                                                                            | <i>Data source(s)</i>                                                                                                                                                                                                                                                        | <i>Probability distribution</i> | <i>Distribution parameters<sup>a</sup></i> |
|-----------------------------------------------------------------------------------------------|------------------------------------------------------------------------------------------------------------------------------------------------------------------------------------------------------------------------------------------------------------------------------|---------------------------------|--------------------------------------------|
| Laboratory testing (% of stool cultures)                                                      | data).                                                                                                                                                                                                                                                                       |                                 |                                            |
| <i>Campylobacter</i>                                                                          | Proportion of clinical laboratories routinely testing stool samples for <i>Campylobacter</i> (FoodNet Laboratory Survey). Uncertainty with this proportion (97%) based on 50% relative increase/decrease from 0.97 on an odds scale.                                         | PERT                            | 94, 97, 100                                |
| <i>E. coli</i> O157                                                                           | Proportion of clinical laboratories routinely testing stool samples for <i>E. coli</i> O157 (FoodNet Laboratory Survey). Uncertainty with this proportion (71%) based on 50% relative increase/decrease from 0.71 on an odds scale.                                          | PERT                            | 62, 71, 79                                 |
| <i>L. monocytogenes</i>                                                                       | We assumed most people with listeriosis who submitted a specimen for testing would be tested for listeriosis.                                                                                                                                                                | PERT                            | 95, 97, 100                                |
| <i>Salmonella</i> , nontyphoidal                                                              | 100% of clinical laboratories reported routinely testing stool samples for <i>Salmonella</i> in the FoodNet Laboratory Survey. We assumed a slightly lower rate of 97%; uncertainty with this proportion based on 50% relative increase/decrease from 0.97 on an odds scale. | PERT                            | 94, 97, 100                                |
| Test sensitivity                                                                              |                                                                                                                                                                                                                                                                              |                                 |                                            |
| <i>Campylobacter</i> , <i>E. coli</i> O157, and nontyphoidal <i>Salmonella</i>                | We used a laboratory test sensitivity rate of 70% based on studies of <i>Salmonella</i> . We assumed a lower bound of 60% and an upper bound of 90%.                                                                                                                         | PERT                            | 60, 70, 90                                 |
| <i>L. monocytogenes</i>                                                                       | 71% based on published study of blood culture sensitivity.                                                                                                                                                                                                                   | PERT                            | 55, 71, 83                                 |
| Proportion of laboratory-confirmed hospitalizations among adults aged ≥65 years (by pathogen) | Proportion of FoodNet cases of infection (by pathogen) among adults aged ≥65 years who were hospitalized (2005–2008).                                                                                                                                                        | Empirical                       | Rate by FoodNet site and year (2005–2008)  |
| Proportion of laboratory-confirmed deaths among adults aged ≥65 years (by pathogen)           | Proportion of FoodNet cases of infection (by pathogen) among adults aged ≥65 years who died (2005–2008).                                                                                                                                                                     | Empirical                       | Rate by FoodNet site and year (2005–2008)  |

<sup>a</sup>Low, middle, and high value for PERT distribution.

<sup>b</sup>Nontyphoidal; includes serotypes other than Typhi.

<sup>c</sup>Because there were few respondents, the rate of medical care-seeking and stool sample submission for older adults with bloody diarrhea was estimated from data for all adults aged ≥50 years.

CDC, Centers for Disease Prevention and Control; CI, confidence interval; FoodNet, Foodborne Diseases Active Surveillance Network; PERT, (originally, Program Evaluation and Review Technique, referring to a project management tool) indicates the four-parameter beta family of probability distributions; here the scale parameter is fixed at 4; UMVU, uniform minimum variance unbiased.
