# Supplementary material
Source: PubMed Central journal article supplement (PMC4630801)
Supplement: NIHMS727463-supplement-Supp_Table_3.pdf [file NIHMS727463-supplement-Supp_Table_3.pdf]

SUPPLEMENTARY APPENDIX TABLE 3. PERCENTAGE “SEVERE” MODEL INPUTS  
FOR *CAMPYLOBACTER* AND NONTYPHOIDAL *SALMONELLA*

| <i>Data source</i>                                                                                                                                                                                                                                                                                                                                                       | <i>Probability distribution</i> | <i>Distribution parameters<sup>a</sup></i> |
|--------------------------------------------------------------------------------------------------------------------------------------------------------------------------------------------------------------------------------------------------------------------------------------------------------------------------------------------------------------------------|---------------------------------|--------------------------------------------|
| <i>Campylobacter</i> spp.                                                                                                                                                                                                                                                                                                                                                |                                 |                                            |
| Proportion of case-patients reporting bloody diarrhea; data from FoodNet case-control study of sporadic laboratory-confirmed <i>Campylobacter</i> infections (Friedman <i>et al.</i> , 2004). UMVU estimators were used for lower and upper endpoints.                                                                                                                   | PERT                            | 36, 45, 52                                 |
| Proportion of case-patients aged ≥65 years by site reporting bloody diarrhea from FoodNet case-control study of sporadic laboratory-confirmed <i>Campylobacter</i> infections (Friedman <i>et al.</i> , 2004). UMVU estimators were used for lower and upper endpoints.                                                                                                  | PERT                            | 2, 22, 38                                  |
| Proportion of case-patients hospitalized with <i>Campylobacter</i> among adults aged ≥65 years from FoodNet surveillance (1996–2012). Uncertainty with this proportion (36%) was based on a 50% relative increase/decrease from 0.36 on an odds scale.                                                                                                                   | PERT                            | 27, 36, 46                                 |
| <i>Salmonella</i> , nontyphoidal                                                                                                                                                                                                                                                                                                                                         |                                 |                                            |
| Proportion of case-patients (in the general population) reporting bloody diarrhea; data from FoodNet case-control studies of sporadic laboratory-confirmed <i>Salmonella</i> infections (Hennessy <i>et al.</i> , 2004; Kimura <i>et al.</i> , 2004; Marcus <i>et al.</i> , 2007; Mermin <i>et al.</i> , 2004). UMVU estimators were used for lower and upper endpoints. | PERT                            | 35, 45, 71                                 |
| Proportion of case-patients aged ≥65 years reporting bloody diarrhea in FoodNet case-control studies of sporadic laboratory-confirmed <i>Salmonella</i> infections (Hennessy <i>et al.</i> , 2004; Kimura <i>et al.</i> , 2004; Marcus <i>et al.</i> , 2007; Mermin <i>et al.</i> , 2004). UMVU estimators were used for lower and upper endpoints.                      | PERT                            | 1, 15, 54                                  |
| Proportion of case-patients hospitalized with <i>Salmonella</i> among adults aged ≥65 years from FoodNet surveillance (1996–2012). Uncertainty with this proportion (55%) was based on a 50% relative increase/decrease from 0.71 on an odds scale.                                                                                                                      | PERT                            | 45, 55, 65                                 |

<sup>a</sup>Low, middle, and high value for PERT distribution.

FoodNet, Foodborne Diseases Active Surveillance Network; PERT (originally, Program Evaluation and Review Technique, referring to a project management tool) indicates the four-parameter beta family of probability distributions; here the scale parameter is fixed at 4; UMVU, uniform minimum variance unbiased.
