# Supplementary material
Source: PubMed Central journal article supplement (PMC4630801)
Supplement: NIHMS727463-supplement-Supp_Table_4.pdf [file NIHMS727463-supplement-Supp_Table_4.pdf]

APPENDIX TABLE 4. ESTIMATED *CAMPYLOBACTER* AND NONTYPHOIDAL *SALMONELLA* INFECTIONS USING DIFFERENT DATA INPUTS FOR PERCENTAGE “SEVERE”

| <i>Data source</i>                                                                | <i>% Severe</i> | <i>Estimated illnesses</i> |                 | <i>Underdiagnosis multiplier (mean)</i> |
|-----------------------------------------------------------------------------------|-----------------|----------------------------|-----------------|-----------------------------------------|
|                                                                                   |                 | <i>Mean</i>                | <i>90% CrI</i>  |                                         |
| <i>Campylobacter</i>                                                              |                 |                            |                 |                                         |
| Proportion of case-patients (in the general population) reporting bloody diarrhea | 45              | 100,200                    | 29,700–255,900  | 24                                      |
| Proportion of case-patients age ≥65 years reporting bloody diarrhea               | 22              | 268,600                    | 70,500–632,000  | 57                                      |
| Proportion of case-patients age ≥65 years hospitalized                            | 36              | 121,100                    | 32,400–281,600  | 26                                      |
| <i>Salmonella</i>                                                                 |                 |                            |                 |                                         |
| Proportion of case-patients in the general population reporting bloody diarrhea   | 45              | 100,100                    | 51,800–213,800  | 23                                      |
| Proportion of case-patients age ≥65 years reporting bloody diarrhea               | 15              | 285,600                    | 128,000–571,100 | 59                                      |
| Proportion of case-patients age ≥65 years hospitalized                            | 55              | 99,800                     | 48,100–191,000  | 20                                      |

CrI, credible interval.
